# Supplementary material for: Dietary Iron Intake and Biomarkers of Iron Status in Slovenian Population: Results of SI.Menu/Nutrihealth Study
Source: MDPI journal article supplement (doi:10.3390/nu14235144), 2022-12-03
Supplement: s1 [file s1]

**Supplementary Table S1.1.** Socio-demographic and lifestyle characteristics for dietary SI.Menu study.

| Variable                                |                                | Adolescents<br>N (%) | Adults<br>N (%) | Elderly<br>N (%) |
|-----------------------------------------|--------------------------------|----------------------|-----------------|------------------|
| Overall                                 |                                | 468 (100)            | 364 (100)       | 416 (100)        |
| Age (mean ± SD)                         |                                | 13.4 (2.37)          | 43.6 (13.81)    | 68.7 (2.7)       |
| Residential area                        | rural                          | 270 (57.7)           | 202 (55.5)      | 229 (55.1)       |
|                                         | intermediate                   | 76 (16.2)            | 56 (15.4)       | 71 (17.1)        |
|                                         | urban                          | 122 (26.1)           | 106 (29.1)      | 116 (27.9)       |
| Sex                                     | male                           | 238 (50.9)           | 173 (47.5)      | 213 (51.2)       |
|                                         | female                         | 230 (49.1)           | 191 (52.5)      | 203 (48.8)       |
| Education                               | no university degree           | n.a.                 | 249 (68.4)      | 342 (82.2)       |
|                                         | university degree              | n.a.                 | 115 (31.6)      | 74 (17.8)        |
| Financial status                        | below average                  | n.a.                 | 118 (38.4)      | 269 (71.5)       |
|                                         | above average                  | n.a.                 | 189 (61.6)      | 107 (28.5)       |
| Employment status                       | employed                       | n.a.                 | 226 (62.1)      | n.a.             |
|                                         | unemployed                     | n.a.                 | 42 (11.5)       | n.a.             |
|                                         | student                        | n.a.                 | 32 (8.8)        | n.a.             |
|                                         | retired                        | n.a.                 | 64 (17.6)       | n.a.             |
| BMI (mean ± SD)                         |                                | 21.0 (4.2)           | 26.7 (5.2)      | 28.4 (5.0)       |
| BMI                                     | normal                         | 301 (64.6)           | 148 (40.7)      | 108 (26.0)       |
|                                         | overweight                     | 167 (35.7)           | 216 (59.3)      | 308 (74.0)       |
| Smoking status                          | current, occasional, ex-smoker | 30 (6.4)             | 165 (45.3)      | 185 (44.5)       |
|                                         | non-smoker                     | 438 (93.6)           | 199 (54.7)      | 231 (55.5)       |
| IPAQ                                    | low intensity                  | 108 (23.3)           | 127 (35.3)      | 137 (33.4)       |
|                                         | moderate intensity             | 141 (30.5)           | 108 (30.0)      | 133 (32.4)       |
|                                         | high intensity                 | 214 (46.2)           | 125 (34.7)      | 140 (34.2)       |
| Supplement use                          | user                           | 129 (27.7)           | 140 (38.4)      | 95 (22.8)        |
|                                         | non-user                       | 339 (72.3)           | 224 (61.6)      | 321 (77.2)       |
| Iron supplement use                     | user                           | 7 (1.5)              | 25 (6.9)        | 5 (1.2)          |
|                                         | non-user                       | 461 (98.5)           | 339 (93.1)      | 411 (98.8)       |
| Diet                                    | vegetarian/vegan               | 12 (2.6)             | 8 (2.2)         | 3 (0.7)          |
|                                         | no diet                        | 456 (97.4)           | 356 (97.8)      | 413 (99.3)       |
|                                         | medical/weight loss            | 13 (2.8)             | 32 (8.8)        | 51 (12.3)        |
|                                         | no special diet                | 455 (97.2)           | 332 (91.2)      | 465 (87.7)       |
| Chronic disease                         | not present                    | /                    | 199 (55.3)      | 81 (19.7)        |
|                                         | present                        | /                    | 161 (44.7)      | 331 (81.3)       |
| Participation in the Nutrihealth study* |                                | /                    | 125 (34.3)      | 155 (37.3)       |

Notes: SD: standard deviation; BMI: body mass index; for adults and elderly, normal BMI was considered below 25 kg/m<sup>2</sup>, while sex-/age-adjusted cut-off points were used for adolescents; IPAQ—physical activity according to International Physical Activity Questionnaire; \*data on biomarkers of iron status were available for participants of the Nutrihealth study. Socio-demographic and lifestyle characteristics for Nutrihealth study is provided in Supplementary Table S1.2. n.a.: Not applicable.

**Supplementary Table S1.2.** Demographic characteristics of the Nutrihealth study sample for adult (18–64 years) and elderly (65–74 years) population.

| Variable                          |                                | Adults     | Elderly    |
|-----------------------------------|--------------------------------|------------|------------|
|                                   |                                | N (%)      | N (%)      |
|                                   |                                | 124 (100)  | 156 (100)  |
| Sex                               | male                           | 57 (46.0)  | 76 (48.7)  |
|                                   | female*                        | 38 (30.6)  | 80 (51.3)  |
|                                   | female**                       | 29 (23.4)  |            |
| Residential area                  | rural                          | 62 (50.0)  | 84 (53.8)  |
|                                   | intermediate                   | 20 (16.1)  | 24 (15.4)  |
|                                   | urban                          | 42 (33.9)  | 48 (30.8)  |
| Education                         | no university degree           | 85 (68.5)  | 117 (74.5) |
|                                   | university degree              | 39 (31.5)  | 39 (25.5)  |
| Financial status                  | below average                  | 47 (41.6)  | 93 (62.0)  |
|                                   | above average                  | 66 (58.4)  | 57 (38.0)  |
| BMI                               | normal                         | 49 (39.5)  | 48 (30.1)  |
|                                   | overweight/obese               | 75 (60.5)  | 108 (69.9) |
| IPAQ                              | low intensity                  | 45 (36.3)  | 45 (29.0)  |
|                                   | moderate intensity             | 35 (28.2)  | 54 (34.8)  |
|                                   | high intensity                 | 44 (35.5)  | 56 (36.2)  |
| Smoking status                    | non-smoker                     | 68 (54.8)  | 92 (59.0)  |
|                                   | current, occasional, ex-smoker | 56 (45.2)  | 64 (41.0)  |
| Chronic disease in the past year  | not present                    | 97 (78.2)  | 101 (64.7) |
|                                   | present                        | 27 (21.8)  | 55 (35.3)  |
| Supplement use                    | user                           | 54 (43.5)  | 49 (31.4)  |
|                                   | non-user                       | 70 (56.5)  | 107 (68.6) |
| iron supplement use               | user                           | 7 (5.6)    | 4 (2.6)    |
|                                   | non-user                       | 117 (94.4) | 152 (97.4) |
| Iron intake                       | inadequate                     | 36 (30.5)  | 20 (13.1)  |
|                                   | adequate                       | 82 (69.5)  | 133 (86.9) |
| Alcoholic beverage consumption    | user                           | 106 (85.5) | 134 (85.9) |
|                                   | non-user                       | 18 (14.5)  | 22 (14.1)  |
| Medical diet                      | no special diet                | 112 (90.3) | 145 (87.9) |
|                                   | medical/weight loss            | 12 (9.7)   | 15 (12.1)  |
| Serum ferritin status (< 30 µg/L) | above                          | 107 (86.3) | 144 (92.3) |
|                                   | below                          | 17 (13.7)  | 12 (7.7)   |
| Serum iron status (< 13 µmol/L)   | above                          | 96 (77.4)  | 142 (91.6) |
|                                   | below                          | 28 (22.6)  | 13 (8.4)   |

Notes: In adolescents and elderly, “female\*\*” included all female participants, while in adults, females were divided into two categories: “female\*” below 50 years (premenopausal), and “female\*\*” 51–64 years (postmenopausal). BMI-body mass index; for adults and elderly, normal BMI was considered below 25 kg/m<sup>2</sup>, while sex-/age- adjusted cut-off points were used for adolescents; thresholds of adequate/inadequate daily iron intake were based on national D-A-CH recommendations: adolescent males: 12 µg/day, adolescent, and premenopausal females: 15 µg /day, adult and elderly males, postmenopausal females: 10 µg/day; Logistic regression analysis conducted on samples with excluded unreported values (financial status: n = 11 adults, 6 elderly; IPAQ (International Physical Activity Questionnaire): n = 1 elderly, iron intake: n=6 adults, 3 elderly)

Supplementary Table S2. Mean (SD) and model adjusted mean (95% CI) usual daily iron intake by different sociodemographic and behavioural variables for adolescent (10–17 years), adult (18–64 years) and elderly (65–74 years) population.

| Variable         |                               | Adolescents (10–17 years) |                    | Adults (18–64 years) |                               | Elderly (65–74 years) |                                |
|------------------|-------------------------------|---------------------------|--------------------|----------------------|-------------------------------|-----------------------|--------------------------------|
|                  |                               | Mean (SD)                 | Adjusted mean (CI) | Mean (SD)            | Adjusted mean (CI)            | Mean (SD)             | Adjusted mean (CI)             |
| Sex              | male                          | 18.2 (5.7)                | 18.1 (17.5–18.8)   | 17.6 (5.1)           | 17.8 (17.0–18.6) <sup>a</sup> | 17.0 (4.8)            | 16.7 (16.1–17.4)               |
|                  | female*                       | 14.6 (4.4)                | 14.8 (14.1–15.4)   | 13.9 (4.3)           | 13.5 (12.5–14.5) <sup>b</sup> | 14.1 (4.0)            | 14.4 (13.7–15.1)               |
|                  | female**                      |                           |                    | 14.3 (4.2)           | 14.9 (13.6–16.2) <sup>b</sup> |                       |                                |
| Residential area | rural                         | 16.5 (5.4)                | 16.6 (16.0–17.2)   | 16.0 (5.1)           | 15.9 (15.2–16.7)              | 16.2 (4.5)            | 16.2 (15.5–16.8) <sup>a</sup>  |
|                  | intermediate                  | 16.3 (4.8)                | 16.5 (15.3–17.6)   | 15.6 (4.8)           | 15.9 (14.5–17.2)              | 14.8 (4.4)            | 15.2 (14.1–16.3) <sup>ab</sup> |
|                  | urban                         | 16.3 (5.8)                | 16.3 (15.4–17.2)   | 15.3 (5.0)           | 15.4 (14.4–16.3)              | 14.9 (4.1)            | 14.7 (13.8–15.6) <sup>b</sup>  |
| Education        | no university degree          | n.a.                      | n.a.               | 15.5 (4.9)           | 15.5 (14.9–16.2)              | 15.5 (4.7)            | 15.4 (14.9–15.9)               |
|                  | university degree             |                           |                    | 16.3 (5.2)           | 16.1 (15.1–17.2)              | 16.1 (4.6)            | 16.3 (15.2–17.5)               |
| Financial status | below average                 | n.a.                      | n.a.               | 15.6 (5.4)           | 15.8 (14.8–16.7)              | 15.3 (4.8)            | 15.2 (14.9–16.8)               |
|                  | above average                 |                           |                    | 15.9 (4.8)           | 15.7 (15.0–16.4)              | 16.4 (4.5)            | 16.5 (15.6–17.4)               |
| Employment       | employed                      | n.a.                      | n.a.               | 16.0 (4.9)           | 16.0 (15.3–16.7)              | n.a.                  | n.a.                           |
|                  | unemployed                    |                           |                    | 14.3 (4.5)           | 14.3 (12.6–15.9)              |                       |                                |
|                  | student                       |                           |                    | 16.9 (6.0)           | 17.0 (14.9–19.2)              |                       |                                |
|                  | retired                       |                           |                    | 15.1 (4.9)           | 15.2 (13.7–16.6)              |                       |                                |
| Smoking status   | current, occasional ex-smoker | 15.4 (6.3)                | 15.4 (13.6–17.3)   | 15.6 (4.8)           | 15.7 (15.0–16.5)              | 16.3 (5.1)            | 15.8 (15.1–16.6)               |
|                  | non-smoker                    | 16.5 (5.3)                | 16.6 (16.1–17.0)   | 15.8 (5.2)           | 15.7 (14.9–16.6)              | 15.0 (4.3)            | 15.4 (14.7–16.0)               |
| BMI              | normal                        | 16.7 (5.7)                | 16.8 (16.3–17.4)   | 15.9 (5.2)           | 16.5 (15.6–17.3)              | 15.0 (4.2)            | 15.4 (14.4–16.4)               |
|                  | overweight and obese          | 16.0 (4.8)                | 15.8 (15.1–16.6)   | 15.6 (4.8)           | 15.3 (14.6–16.0)              | 15.8 (4.8)            | 15.6 (15.1–16.2)               |
| IPAQ             | low intensity                 | 17.3 (5.7)                | 17.0 (16.1–18.0)   | 16.0 (5.1)           | 16.3 (15.4–17.2)              | 15.9 (4.7)            | 15.7 (14.9–16.5)               |
|                  | moderate                      | 16.0 (5.4)                | 16.5 (15.7–17.4)   | 15.3 (4.9)           | 15.4 (14.4–16.4)              | 14.9 (4.6)            | 15.2 (14.4–16.0)               |
|                  | high intensity                | 16.4 (5.2)                | 16.2 (15.5–16.9)   | 15.7 (4.8)           | 15.5 (14.6–16.4)              | 15.9 (4.7)            | 15.8 (15.0–16.6)               |

|                     |                     |            |                  |            |                   |            |                  |
|---------------------|---------------------|------------|------------------|------------|-------------------|------------|------------------|
| Recent/past disease | not present         | n.a.       | n.a.             | 15.9 (5.1) | 15.9 (15.2-16.7)  | 17.1 (8.9) | 16.3 (15.2-17.4) |
|                     | present             |            |                  | 15.5 (4.8) | 15.5 (14.7-16.3)  | 16.1 (4.6) | 15.4 (14.9-15.9) |
| Diet                | no special diet     | 16.4 (5.4) | 16.5 (16.0-16.9) | 15.7 (4.9) | 15.7 (15.2-16.2)) | 15.6 (4.5) | 15.5 (15.0-16.0) |
|                     | medical/weight loss | 17.5 (5.1) | 17.3 (14.5-20.1) | 16.2 (6.0) | 16.3 (14.5-18.2)  | 15.6 (5.7) | 16.0 (14.7-17.4) |
| Behavioural diet    | no diet             | 16.6 (5.3) | 16.6 (16.2-17.1) | 15.7 (5.0) | 15.8 (15.2-16.3)  | 15.6 (4.7) | 15.6 (15.2-16.1) |
|                     | vegetarian/vegan    | 9.5 (3.8)  | 11.4 (8.4-14.3)  | 15.0 (6.0) | 15.2 (11.8-18.6)  | 13.1 (2.5) | 10.8 (5.5-16.2)  |

Note: In adolescents and elderly, "female\*" included all female participants, while in adults, females were divided into two categories: "female\*" below 50 years (premenopausal), and "female\*\*" 51-64 years (postmenopausal); BMI-body mass index; for adults and elderly, normal BMI was considered below 25 kg/m<sup>2</sup>, while sex-/age- adjusted cut-off points were used for adolescents; IPAQ-International Physical Activity Questionnaire; SD-standard deviation; CI-confidence interval; Difference in marginal linear predictions per different socio-demographic and other individual related characteristics within age categories: p<0.001 sex (adolescents), p<0.001 behavioural diet (adolescents); p<0.001 sex (adults), p<0.05 BMI (adults); p<0.001 sex (elderly), p<0.05 residential area (elderly), p<0.1 financial status (elderly), p<0.1 behavioural diet (elderly). Where three or more levels per predictor are present the pairwise comparisons are performed using Sidak adjustment; different superscript letters indicate significant differences between levels.

Supplementary Table S3. Relative contribution of selected food categories to usual daily dietary iron intake for adolescent (10–17 years), adult (18–64 years) and elderly (65–74 years) population

| Food category              | Food category contribution in total daily dietary iron intake (%) |                      |                       |
|----------------------------|-------------------------------------------------------------------|----------------------|-----------------------|
|                            | Adolescents (10-17 years)                                         | Adults (18-64 years) | Elderly (65-74 years) |
| Fruit and vegetables       | 15,51                                                             | 20,57                | 21,31                 |
| Vegetables                 | 10,80                                                             | 14,23                | 15,04                 |
| Fruit                      | 3,53                                                              | 4,05                 | 4,59                  |
| Nuts and seeds             | 1,07                                                              | 2,17                 | 1,51                  |
| Bread and bakery products  | 33,75                                                             | 34,99                | 38,89                 |
| Bread                      | 26,66                                                             | 29,35                | 33,92                 |
| White bread                | 18,49                                                             | 17,32                | 16,48                 |
| Brown bread                | 8,17                                                              | 12,03                | 17,45                 |
| Biscuits                   | 2,85                                                              | 2,23                 | 1,96                  |
| Cakes, muffins, and pastry | 4,24                                                              | 3,41                 | 3,00                  |
| Cereal and cereal products | 18,82                                                             | 11,53                | 7,78                  |
| Breakfast cereals          | 13,92                                                             | 7,39                 | 4,62                  |
| Pasta                      | 3,05                                                              | 3,13                 | 2,48                  |
| Rice                       | 0,68                                                              | 0,51                 | 0,58                  |
| Snackfoods                 | 1,38                                                              | 0,71                 | 0,29                  |
| Convenience foods          | 2,01                                                              | 1,88                 | 1,72                  |
| Ready meals                | 2,01                                                              | 1,88                 | 1,72                  |
| Meat and meat products     | 16,00                                                             | 19,31                | 19,36                 |
| Processed meat             | 3,06                                                              | 3,11                 | 2,78                  |
| Unprocessed meat           | 12,83                                                             | 15,86                | 16,16                 |
| Fish and fish products     | 1,59                                                              | 1,72                 | 1,82                  |
| Milk and milk products     | 3,22                                                              | 2,62                 | 2,20                  |
| Milk                       | 1,95                                                              | 1,28                 | 1,07                  |
| Yogurt                     | 0,35                                                              | 0,35                 | 0,31                  |
| Cheese                     | 0,91                                                              | 0,97                 | 0,79                  |
| Other                      | 7,72                                                              | 6,67                 | 6,62                  |

**Supplementary Table S4.** Association between low ferritin concentration (<30 µg/L) and different sociodemographic and behavioural variables in the Nutrihealth study

| Variable                         |                                | Level | Adults (18–64 years old) |                |                  | Elderly (65–74 years old) |                |                  |
|----------------------------------|--------------------------------|-------|--------------------------|----------------|------------------|---------------------------|----------------|------------------|
|                                  |                                |       | Prevalence (%)           | Crude OR (CI)  | Adjusted OR (CI) | Prevalence (%)            | Crude OR (CI)  | Adjusted OR (CI) |
| Unweighted data N (%)            |                                |       | 17 (13.7)                |                | 12 (7.7)         |                           |                |                  |
| Sex                              | male                           |       | 4 (7.0)                  | 1              | 1                | 5 (6.6)                   | 1              | 1                |
|                                  | female                         |       | 13 (9.4)                 | 3.2 (0.9-14.2) | 3.5 (0.3-47.2)   | 7 (8.8)                   | 1.4 (0.4-5.7)  | 1.6 (0.4-7.2)    |
| Residential area                 | rural                          |       | 6 (9.7)                  | 1              | 1                | 5 (6.0)                   | 1              | 1                |
|                                  | intermediate                   |       | 3 (15.0)                 | 1.6 (0.2-8.7)  | 1.4 (0.1-14.6)   | 1 (4.2)                   | 0.7 (0.01-6.6) | 0.3 (0.2-4.6)    |
|                                  | urban                          |       | 8 (19.1)                 | 2.2 (0.6-8.3)  | 1.2 (0.2-6.2)    | 6 (12.5)                  | 2.3 (0.5-9.9)  | 1.9 (0.4-8.4)    |
| Education                        | no university degree           |       | 9 (11.4)                 | 1              | 1                | 6 (5.3)                   | 1              | 1                |
|                                  | university degree              |       | 7 (18.0)                 | 1.7 (0.5-5.6)  | 1.8 (0.3-10.9)   | 6 (15.4)                  | 3.3 (0.8-13.0) | 3.8 (0.8-17.1)   |
| Financial status                 | below average                  |       | 6 (13.6)                 | 1              | 1                | 7 (7.6)                   | 1              | 1                |
|                                  | above average                  |       | 8 (12.7)                 | 0.9 (0.3-3.5)  | 0.4 (0.1-2.6)    | 5 (9.1)                   | 1.2 (0.3-4.7)  | 1.3 (0.3-5.6)    |
| BMI                              | normal                         |       | 12 (26.1)                | 1              | 1                | 2 (4.4)                   | 1              | 1                |
|                                  | overweight                     |       | 4 (5.6)                  | 0.2 (0.04-0.6) | 0.2 (0.04-1.1)   | 10 (9.4)                  | 2.3 (0.5-22.0) | 3.0 (0.5-17.3)   |
| IPAQ                             | low intensity                  |       | 3 (7.1)                  | 1              | 1                | 5 (11.1)                  | 1              | 1                |
|                                  | moderate intensity             |       | 6 (17.7)                 | 2.8 (0.5-18.4) | 2.4 (0.3-19.1)   | 3 (5.6)                   | 0.5 (0.1-2.6)  | 0.3 (0.1-1.7)    |
|                                  | high intensity                 |       | 7 (16.7)                 | 2.6 (0.5-16.6) | 6.0 (0.8-45.9)   | 4 (7.6)                   | 0.7 (0.1-3.3)  | 0.6 (0.1-2.9)    |
| Smoking status                   | non-smoker                     |       | 8 (12.7)                 | 1              | 1                | 8 (9.0)                   | 1              | 1                |
|                                  | current, occasional, ex-smoker |       | 8 (14.6)                 | 1.2 (0.4-3.9)  | 0.7 (0.1-3.6)    | 4 (6.3)                   | 0.7 (0.1-2.7)  | 0.5 (0.1-2.4)    |
| Chronic disease in the past year | not present                    |       | 14 (14.4)                | 1              | 1                | 8 (7.9)                   | 1              | 1                |
|                                  | present                        |       | 3 (11.1)                 | 0.7 (0.1-3.0)  | 1.3 (0.2-9.8)    | 4 (7.3)                   | 0.9 (0.2-3.6)  | 1.0 (0.2-4.8)    |
| Supplement use                   | non-user                       |       | 6 (9.2)                  | 1              | 1                | 9 (8.7)                   | 1              | 1                |
|                                  | user                           |       | 10 (18.9)                | 2.3 (0.7-8.2)  | 2.1 (0.4-9.7)    | 3 (6.1)                   | 0.7 (0.1-2.9)  | 0.4 (0.1-1.8)    |
| Iron intake                      | inadequate                     |       | 10 (27.8)                | 1              | 1                | 2 (10.0)                  | 1              | 1                |
|                                  | adequate                       |       | 6 (7.3)                  | 0.2 (0.1-0.7)  | 0.2 (0.3-1.0)    | 10 (7.5)                  | 0.7 (0.1-7.4)  | 0.4 (0.1-2.9)    |
| Tea consumption                  | <3x week/never                 |       | 15 (14.2)                | 1              | 1                | 10 (7.1)                  | 1              | 1                |
|                                  | other                          |       | 2 (11.1)                 | 0.8 (0.1-3.8)  | 0.3 (0.2-3.6)    | 2 (13.3)                  | 0.5 (0.01-4.0) | 2.1 (0.3-13.3)   |
| Alcoholic beverage               | users                          |       | 14 (13.2)                | 1              | 1                | 11 (8.2)                  | 1              | 1                |

|                  |                     |           |                 |                |          |                  |                |
|------------------|---------------------|-----------|-----------------|----------------|----------|------------------|----------------|
| consumption      | non-users           | 3 (16.7)  | 1.3 (0.2-5.6)   | 0.4 (0.3-22.5) | 1 (4.6)  | 2.0 (0.2-11.03)  | 0.5 (0.04-4.8) |
| Medical diet     | no special diet     | 15 (14.1) | 1               | 1              | 10 (7.3) | 1                | 1              |
|                  | medical/weight loss | 1 (9.1)   | 0.6 (0.01-4.9)  | 0.8 (0.3-18.1) | 2 (13.3) | 1.07 (0.41-2.47) | 2.9 (0.4-24.2) |
| Behavioural diet | no diet             | 15 (12.9) | 1               | n.a.           | 12 (8.0) | n.a.             | n.a.           |
|                  | vegetarian/vegan    | 1 (50)    | 6.7 (0.1-533.5) | n.a.           | 0 (0.0)  | n.a.             | n.a.           |

Notes: Cut-off odds ratios (OR) calculated at <30 µg/L serum ferritin concentration. n.a. not applicable; CI: confidence interval; OR: odds ratio; BMI: body mass index; normal considered below 25 kg/m<sup>2</sup>; thresholds of adequate/inadequate daily iron intake were based on nationally adapted D-A-CH recommendations: adolescent males: 12 µg/day, adolescent, and premenopausal females: 15 µg /day, adult and elderly males, postmenopausal females: 10 µg/day; IPAQ-International Physical Activity Questionnaire; Significant association: p<0.05 iron intake (adults); Marginally significant association: p<0.1 education (elderly).

**Supplementary Table S5.** Association between ferritin concentration <100 µg/L and different sociodemographic and behavioural variables for elderly population (65–74 years)

| Variable                       | Level                          | Elderly (65–74 years) |               |                  |
|--------------------------------|--------------------------------|-----------------------|---------------|------------------|
|                                |                                | Prevalence (%)        | Crude OR (CI) | Adjusted OR (CI) |
| Unweighted data N (%)          |                                | 65 (41.7)             |               |                  |
| Sex                            | male                           | 21 (27.6)             | 1             | 1                |
|                                | female                         | 44 (55.0)             | 3.2 (1.6-6.6) | 2.9 (1.3-6.6)    |
| Residential area               | rural                          | 31 (36.9)             | 1             | 1                |
|                                | intermediate                   | 11 (45.8)             | 1.4 (0.5-4.0) | 1.1 (0.4-3.2)    |
|                                | urban                          | 23 (47.9)             | 1.6 (0.7-3.4) | 1.4 (0.6-3.3)    |
| Education                      | no university degree           | 42 (36.8)             | 1             | 1                |
|                                | university degree              | 20 (51.3)             | 1.8 (0.8-4.0) | 1.4 (0.6-3.5)    |
| Financial status               | below average                  | 33 (35.9)             | 1             | 1                |
|                                | above average                  | 26 (47.3)             | 1.6 (0.8-3.3) | 1.0 (0.4-2.3)    |
| BMI                            | normal                         | 19 (17.6)             | 1             | 1                |
|                                | overweight/obese               | 43 (14.0)             | 0.6 (0.3-1.2) | 0.8 (0.4-1.8)    |
| IPAQ                           | low intensity                  | 21 (46.7)             | 1             | 1                |
|                                | moderate intensity             | 22 (40.7)             | 0.8 (0.3-1.9) | 0.9 (0.4-2.1)    |
|                                | high intensity                 | 18 (34.0)             | 0.6 (0.2-1.4) | 0.6 (0.3-1.6)    |
| Smoking status                 | non-smoker                     | 39 (43.8)             | 1             | 1                |
|                                | current, occasional, ex-smoker | 23 (35.9)             | 0.7 (0.4-1.5) | 1.2 (0.5-2.7)    |
| Recent/past disease            | not present                    | 44 (43.6)             | 1             | 1                |
|                                | present                        | 21 (38.2)             | 0.8 (0.4-1.6) | 0.8 (0.3-1.7)    |
| Supplement use                 | non-user                       | 39 (37.5)             | 1             | 1                |
|                                | user                           | 23 (46.9)             | 1.5 (0.7-3.1) | 1.0 (0.4-2.2)    |
| Iron intake                    | inadequate                     | 9 (45.0)              | 1             | 1                |
|                                | adequate                       | 53 (39.9)             | 0.8 (0.3-2.4) | 1.1 (0.4-3.2)    |
| Tea consumption                | <3x week/never                 | 58 (41.1)             | 1             | 1                |
|                                | other                          | 7 (46.7)              | 1.3 (0.4-4.2) | 1.8 (0.6-5.9)    |
| Alcoholic beverage consumption | users                          | 55 (41.0)             | 1             | 1                |
|                                | non-users                      | 10 (45.5)             | 1.2 (0.4-3.3) | 1.2 (0.5-3.9)    |
| Medical diet                   | no special diet                | 54 (39.1)             | 1             | 1                |
|                                | medical/weight loss            | 8 (53.3)              | 1.8 (0.5-6.1) | 2.6 (0.8-9.1)    |

Notes: Cut-off odds ratios (OR) calculated at <100 µg/L serum ferritin concentration. CI: confidence interval; BMI: body mass index; considered as normal below 25 kg/m<sup>2</sup>, thresholds of adequate/inadequate daily iron intake were based on nationally adapted D-A-CH recommendations for elderly: 10 µg/day; IPAQ-International Physical Activity Questionnaire; Significant correlation: p < 0.05 sex.



**Supplementary Table S6.** Mean (SD) and model adjusted marginal means (95% CI) of haemoglobin according to participants' sociodemographic, health and dietary related characteristics in adults and the elderly in the Nutrihealth study (N=280).

| Variable                       |                                | Adults (18–64 years) |                     | Elderly (65–74 years) |                     |
|--------------------------------|--------------------------------|----------------------|---------------------|-----------------------|---------------------|
|                                |                                | N (%)                | Adjusted mean (CI)  | N (%)                 | Adjusted mean (CI)  |
|                                |                                | 124 (100)            |                     | 156 (100)             |                     |
| Sex                            | male                           | 57 (46.0)            | 152.5 (148.8-156.2) | 76 (48.7)             | 150.2 (147.6-152.8) |
|                                | female*                        | 38 (30.6)            | 140.8 (136.2-145.3) | 80 (51.3)             | 140.8 (138.2-143.3) |
|                                | female**                       | 29 (23.4)            | 139.3 (135.2-143.4) |                       |                     |
| Residential area               | rural                          | 62 (50.0)            | 144.9 (142.0-147.8) | 84 (53.8)             | 146.4 (144.1-148.7) |
|                                | intermediate                   | 20 (16.1)            | 145.5 (140.6-150.4) | 24 (15.4)             | 140.7 (136.2-145.1) |
|                                | urban                          | 42 (33.9)            | 144.8 (141.5-148.2) | 48 (30.8)             | 145.9 (142.7-149.1) |
| Education                      | no university degree           | 85 (68.5)            | 145.4 (142.9-148.0) | 117 (74.5)            | 145.4 (143.4-147.4) |
|                                | university degree              | 39(31.5)             | 143.9 (140.2-147.7) | 39 (25.5)             | 145.4 (141.7-149.1) |
| Financial status               | below average                  | 47 (41.6)            | 142.1 (138.7-145.4) | 93 (62.0)             | 144.8 (142.6-147.0) |
|                                | above average                  | 66 (58.4)            | 146.9 (144.2-149.6) | 57 (38.0)             | 146.4 (143.4-149.3) |
| BMI                            | normal                         | 49 (39.5)            | 144.4 (141.0-147.7) | 48 (30.1)             | 144.2 (141.0-147.4) |
|                                | overweight                     | 75 (60.5)            | 145.3 (142.7-147.9) | 108 (69.9)            | 145.9 (143.9-147.9) |
| IPAQ                           | low intensity                  | 45 (36.3)            | 143.5 (140.1-146.9) | 45 (29.0)             | 146.6 (143.4-149.7) |
|                                | moderate intensity             | 35 (28.2)            | 145.8 (142.2-149.3) | 54 (34.8)             | 144.7 (141.8-147.5) |
|                                | high intensity                 | 44 (35.5)            | 145.7 (142.2-149.1) | 56 (36.2)             | 145.2 (142.3-148.1) |
| Smoking status                 | non-smoker                     | 68 (54.8)            | 143.5 (140.8-146.3) | 92 (59.0)             | 144.4 (142.8-147.0) |
|                                | current, occasional, ex-smoker | 56 (45.2)            | 146.5 (143.6-149.4) | 64 (41.0)             | 146.9 (144.0-149.7) |
| Recent/past disease            | not present                    | 97 (78.2)            | 144.6 (142.3-146.8) | 101 (64.7)            | 144.9 (142.8-147.0) |
|                                | present                        | 27 (21.8)            | 146.1 (141.9-150.3) | 55 (35.3)             | 146.3 (143.3-149.3) |
| Supplement use                 | user                           | 54 (43.5)            | 144.0 (140.8-147.2) | 49 (31.4)             | 145.3 (142.2-148.4) |
|                                | non-user                       | 70 (56.5)            | 145.7 (142.9-148.4) | 107 (68.6)            | 145.4 (143.3-147.5) |
| Iron intake                    | inadequate                     | 36 (30.5)            | 146.5 (141.9-151.1) | 20 (13.1)             | 143.6 (139.0-148.3) |
|                                | adequate                       | 82 (69.5)            | 144.0 (141.4-147.0) | 133 (86.9)            | 145.7 (143.9-147.5) |
| Alcoholic beverage consumption | users                          | 106 (85.5)           | 144.0 (141.9-146.1) | 134 (85.9)            | 144.8 (143.0-146.6) |
|                                | non-users                      | 18 (14.5)            | 149.7 (144.5-154.9) | 22 (14.1)             | 149.0 (144.3-153.7) |
| Medical diet                   | no special diet                | 112 (90.3)           | 144.8 (142.8-146.8) | 145 (87.9)            | 146.5 (144.7-148.2) |
|                                | medical/weight loss            | 12 (9.7)             | 146.0 (139.8-152.2) | 15 (12.1)             | 135.6 (129.9-141.3) |
| Serum ferritin                 | ≥ 30 µg/L                      | 107 (86.3)           | 146.6 (144.5-148.7) | 144 (92.3)            | 146.2 (144.5-147.9) |
|                                | < 30 µg/L                      | 17 (13.7)            | 134.1 (128.1-140.1) | 12 (7.7)              | 136.9 (130.9-142.9) |
| Serum iron                     | ≥ 13 µmol/L                    | 96 (77.4)            | 146.2 (144.0-148.5) | 142 (91.6)            | 146.1 (144.3-147.8) |
|                                | < 13 µmol/L                    | 28 (22.6)            | 140.8 (136.5-145.1) | 13 (8.4)              | 138.1 (132.1-144.0) |

Notes: In adolescents and elderly, “female\*\*” included all female participants, while in adults, females were divided into subgroup of “female\*” below 50 years (premenopausal), and “female\*\*\*” 51-64 years (postmenopausal). SD: standard deviation; CI: confidence interval; BMI: body mass index (considered as normal below 25 kg/m<sup>2</sup>); thresholds of adequate/inadequate iron intake were based on nationally adapted D-A-CH recommendations: adolescent males: 12 µg/day, adolescent and premenopausal females: 15 µg /day; adult and elderly males, postmenopausal females: 10 µg/day. Association based on contrast of marginal linear predictions was significant for the following variables: p<0.001 sex (adults), p<0.05 education (adults), p=0.05 alcoholic beverage consumption (adults), p<0.001 ferritin status (adults), p<0.05 serum iron status (adults); p< 0.001 sex (elderly), p<0.001 medical diet (elderly), p<0.001 ferritin status (elderly), and p<0.05 serum iron status (elderly). Marginal correlation with p<0.1 was found for residential area (elderly) and alcoholic beverage consumption (elderly).

**Supplementary Table S7.** Mean (SD) total iron intake, iron intake from meat and fish products, ferritin, K-haemoglobin and serum iron for participants in the Nutrihealth study, with exclusion of subjects using iron food supplement.

| Variables                           | Levels                            | Total iron intake<br>(mg/day) | Iron intake from<br>meat and fish prod-<br>ucts (mg/day) | Ferritin [ $\mu\text{g/L}$ ] | Haemoglobin<br>[g/L] | Serum iron<br>[ $\mu\text{mol/L}$ ] |
|-------------------------------------|-----------------------------------|-------------------------------|----------------------------------------------------------|------------------------------|----------------------|-------------------------------------|
|                                     |                                   | Mean (SD)                     | Mean (SD)                                                | Mean (SD)                    | Mean (SD)            | Mean (SD)                           |
| Sex/Age                             | Male (18-64 y.)                   | 17.7 (4.3)                    | 3.5 (1.4)                                                | 179 (151.2)                  | 152.1 (10.4)         | 18.8 (6.3)                          |
|                                     | Male (64-75 y.)                   | 16.7 (4.6)                    | 3.0 (1.4)                                                | 222.6 (206.2)                | 152 (11.6)           | 20.9 (6.6)                          |
|                                     | Female (18-50 y.)                 | 14.5 (4.3)                    | 2.0 (0.9)                                                | 70.3 (92.9)                  | 139.3 (10.1)         | 16.6 (6.8)                          |
|                                     | Female (50-64 y.)                 | 15.0 (4.9)                    | 2.8 (2.5)                                                | 91.2 (41.7)                  | 140.4 (9.7)          | 16.6 (4.8)                          |
|                                     | Female (64-75 y.)                 | 15.1 (4.2)                    | 2.1 (1.2)                                                | 125.2 (96.7)                 | 138.7 (9.7)          | 17.7 (5.1)                          |
| BMI                                 | normal                            | 16 (4.7)                      | 2.4 (1.3)                                                | 125.1 (126.5)                | 143.6 (12)           | 18.8 (6.8)                          |
|                                     | overweight/obese                  | 15.9 (4.5)                    | 2.8 (1.6)                                                | 167.5 (163.3)                | 146.3 (12.2)         | 18.5 (5.9)                          |
| Residential area                    | rural                             | 16.1 (4.4)                    | 2.8 (1.4)                                                | 162.5 (166.8)                | 146.6 (13.1)         | 18.4 (6)                            |
|                                     | intermediate                      | 15.5 (4.1)                    | 2.7 (1.3)                                                | 161.1 (132.1)                | 143.1 (11.5)         | 17.4 (5.2)                          |
|                                     | urban                             | 15.9 (4.9)                    | 2.5 (1.8)                                                | 134.7 (137.2)                | 144.3 (10.7)         | 19.5 (6.7)                          |
| Education                           | no university de-<br>gree         | 16.1 (4.8)                    | 2.7 (1.6)                                                | 154 (156.9)                  | 145.3 (12.2)         | 18.9 (6.1)                          |
|                                     | university degree                 | 15.7 (3.8)                    | 2.8 (1.4)                                                | 150.9 (143.4)                | 145.5 (12.2)         | 17.8 (6.2)                          |
| Financial status                    | below average                     | 15.8 (4.8)                    | 2.7 (1.7)                                                | 157.4 (155.9)                | 144.7 (11.6)         | 18.3 (5.3)                          |
|                                     | above average                     | 16 (4.4)                      | 2.6 (1.3)                                                | 145.7 (133.9)                | 146.1 (12.7)         | 19 (7.2)                            |
| IPAQ                                | low intensity                     | 16.1 (4.8)                    | 2.8 (1.9)                                                | 167.1 (187.0)                | 145.6 (13.1)         | 17.5 (5.3)                          |
|                                     | moderate                          | 15.9 (4.8)                    | 2.6 (1.1)                                                | 145.2 (137.5)                | 145.0 (11.2)         | 18.6 (6.6)                          |
|                                     | high intensity                    | 16.0 (4.1)                    | 2.7 (1.5)                                                | 153.9 (138.2)                | 146.4 (12.4)         | 19.8 (6.5)                          |
| Smoking status                      | non-smoker                        | 15.9 (4.5)                    | 2.6 (1.6)                                                | 144.2 (145.1)                | 142.7 (11.6)         | 17.5 (5.3)                          |
|                                     | current, occasional,<br>ex-smoker | 16.1 (4.7)                    | 2.7 (1.4)                                                | 164.7 (162.3)                | 148.8 (12.2)         | 20 (6.9)                            |
| Chronic disease in<br>the past year | not present                       | 16 (4.6)                      | 2.7 (1.6)                                                | 134.3 (132.2)                | 145 (12)             | 18.3 (6.5)                          |
|                                     | present                           | 15.9 (4.4)                    | 2.6 (1.2)                                                | 196.1 (185.9)                | 146.2 (12.8)         | 19.2 (5.4)                          |

Notes: Total iron intake with foods (not including food supplements and medicines); SD: standard deviation; BMI: body mass index; considered as normal below 25 kg/m<sup>2</sup>.

**Supplementary Table S8.** Contribution of selected food categories to total dietary iron intake according to ferritin status of the participants in the Nutrihealth study.

| Food category                        | Contribution of the food category to dietary iron intake |                          |                          |                          |
|--------------------------------------|----------------------------------------------------------|--------------------------|--------------------------|--------------------------|
|                                      | Ferritin concentra-                                      | Ferritin concentra-      | Ferritin concentra-      | Ferritin concentra-      |
|                                      | tion <30 µg/L                                            | tion >30 µg/L            | tion <100 µg/L           | tion >100 µg/L           |
|                                      | Mean (SD)                                                | Mean (SD)                | Mean (SD)                | Mean (SD)                |
| Vegetable and vegetable products (%) | 10.7 (5.6)                                               | 10.8 (6.7)               | 10.5 (6.3)               | 11.2 (6.9)               |
| Cereal and cereal products (%)       | 11.5 (8.4)                                               | 9.4 (9.7)                | 10.6 (10.8)              | 8.7 (8.1)                |
| Bread and bakery products (%)        | 27.2 (11.5) <sup>a</sup>                                 | 30.3 (11.7) <sup>b</sup> | 28.7 (11.7) <sup>a</sup> | 31.2 (11.6) <sup>b</sup> |
| Meat and fish products (%)           | 17.8 (7.3)                                               | 18.2 (8.2)               | 17.3 (7.7) <sup>a</sup>  | 19.0 (8.4) <sup>b</sup>  |
| Mean dietary iron intake (µg/day)    | 15.7 (4.7)                                               | 15.9 (4.5)               | 15.6 (4.3)               | 16.2 (4.7)               |

Note: Superscript letters denote marginally significant difference at p < 0.1 using t-test for independent samples.

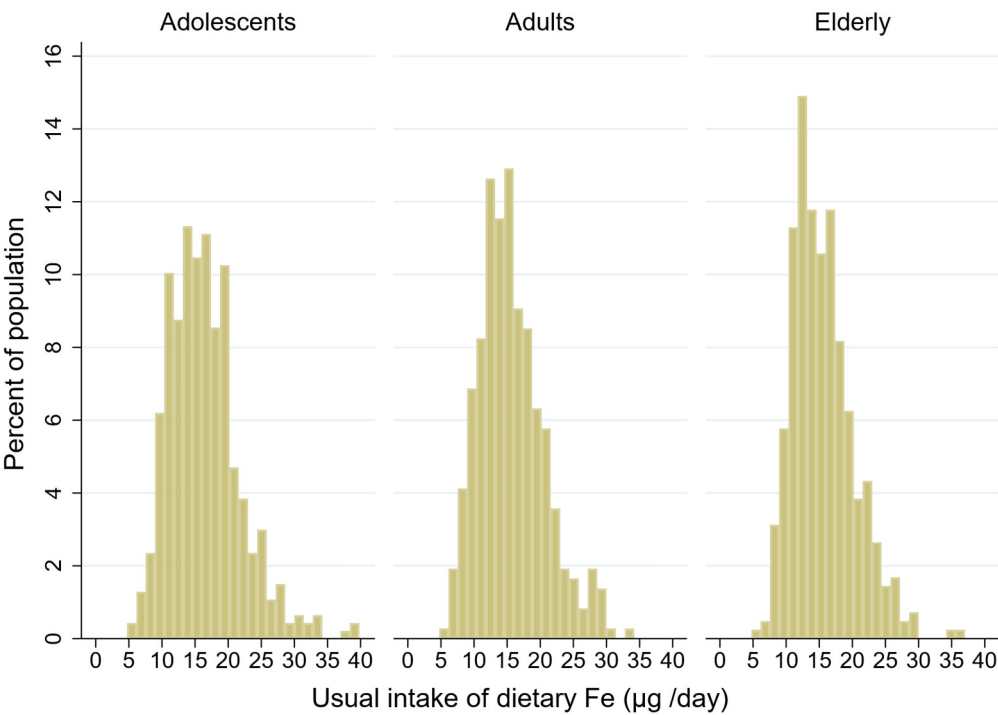

**Supplementary Figure S1.** Sample population distribution of the reported usual daily dietary iron intake for different age groups (Adolescents: 10-17 years; Adults: 18-64 years; Elderly: 65-74 years).

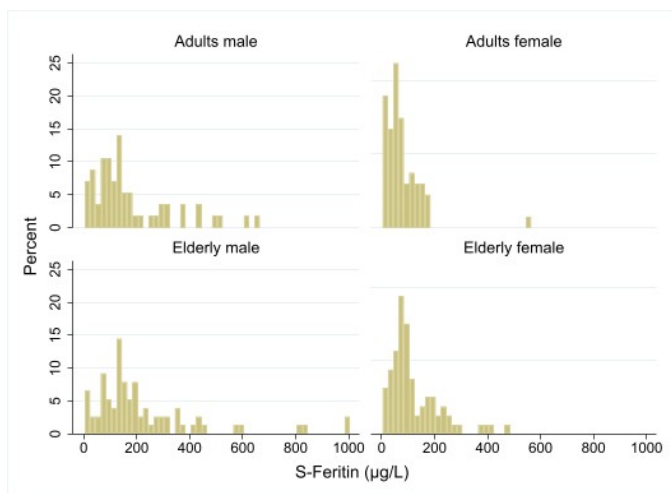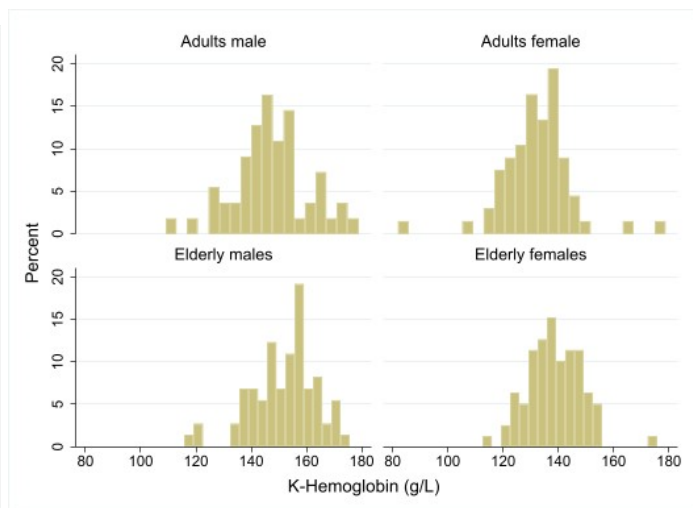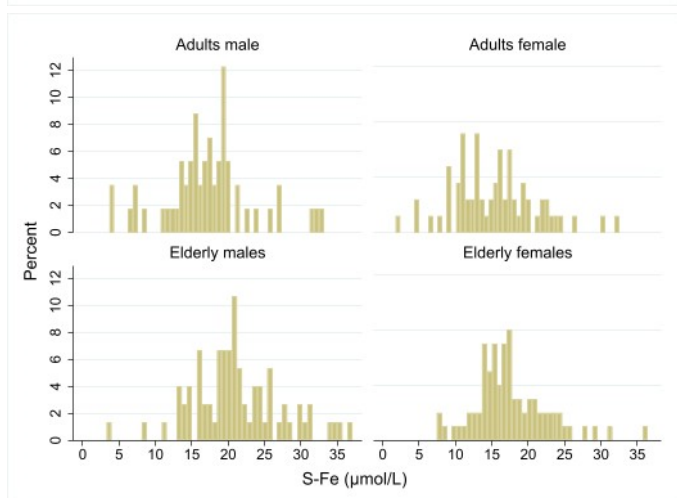

**Supplementary Figure S2.** Serum ferritin, haemoglobin, and serum iron concentration distribution in adult (18-64 years) and elderly (65-74 years) participants of the Nutrihealth study.
